# Supplementary material for: Surface structure of a “non-amphiphilic” protic ionic liquid
Source: Royal Society of Chemistry journal article supplement (doi:10.1039/c2cp23694j), 2011-12-23
Supplement: c2cp23694j.pdf [file c2cp23694j.pdf]

## SUPPORTING INFORMATION

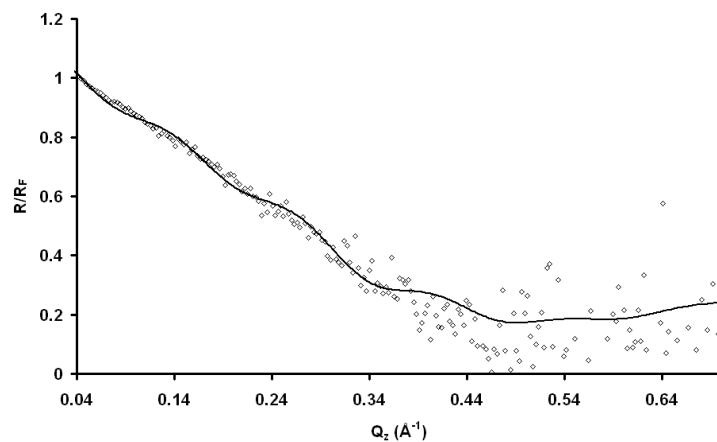

**Figure 1:** X-ray reflectivity profile (displayed as  $R/R_F$  vs  $Q_z$ ) for the EtAN - air interface. The solid line represents the modeled x-ray reflectivity fit using the Chebyshev routine.

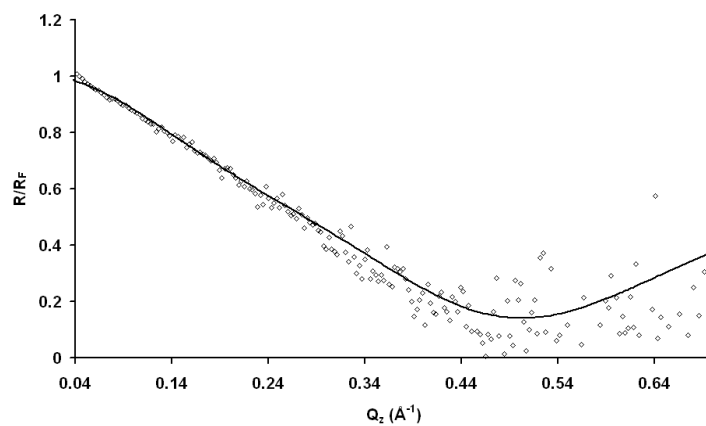

**Figure 2:** X-ray reflectivity profile (displayed as  $R/R_F$  vs  $Q_z$ ) for the EtAN - air interface. The solid line represents the modeled x-ray reflectivity fit using the slices routine.

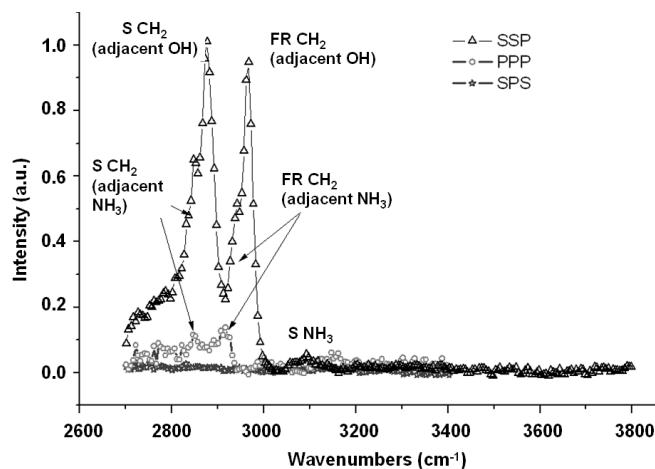

**Figure 3:** VSFS spectra for the SSP, PPP, and SPS polarisations of the EtAN – air interface in the CH, NH, and OH region.

**Equation 1:** Capillary wave roughness of a liquid surface

$$\sigma^2 = \frac{k_B T}{2\pi\gamma} \ln\left(\frac{q_{\max}}{q_{\min}}\right)$$

where  $k_B$  is Boltzmann's constant,  $T$  is the temperature,  $\gamma$  is the surface tension of the liquid,  $q_{\max}$

$= (2\pi/D)$  and  $D$  is molecular diameter (0.54nm), and  $q_{\min} = (2\pi/\lambda)\Delta\beta\sin\theta$  and  $\Delta\beta$  is the

angular acceptance of the detector.
